# Supplementary material for: A Novel Immune-Related lncRNA-Based Model for Survival Prediction in Clear Cell Renal Cell Carcinoma
Source: Hindawi journal article supplement (doi:10.1155/2021/9921466), 2021-06-28

**A**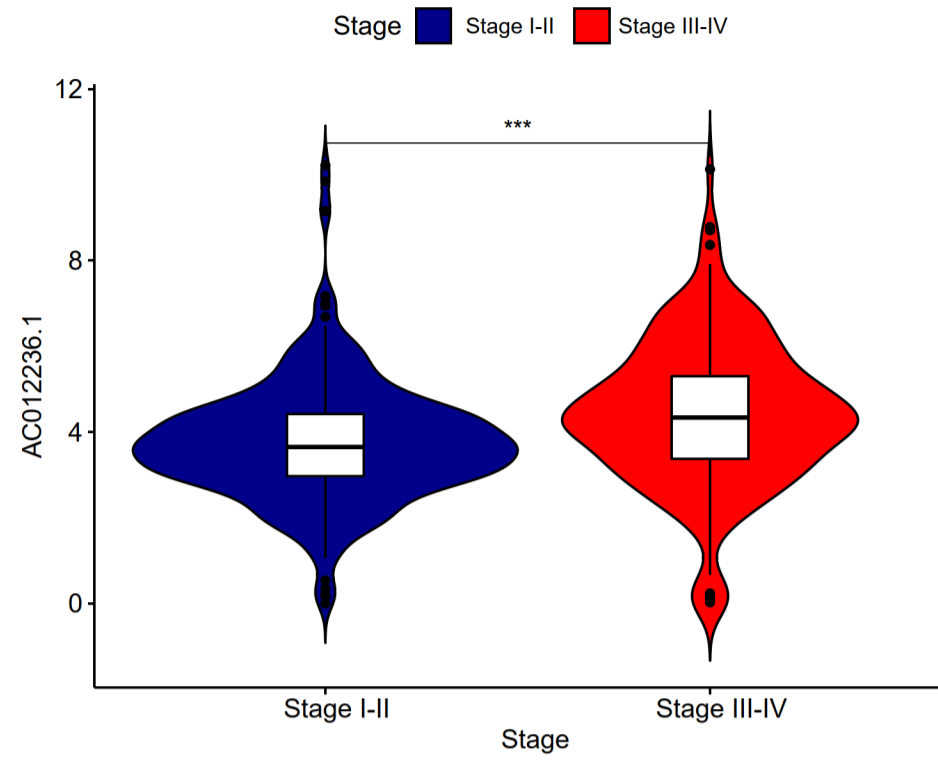**B**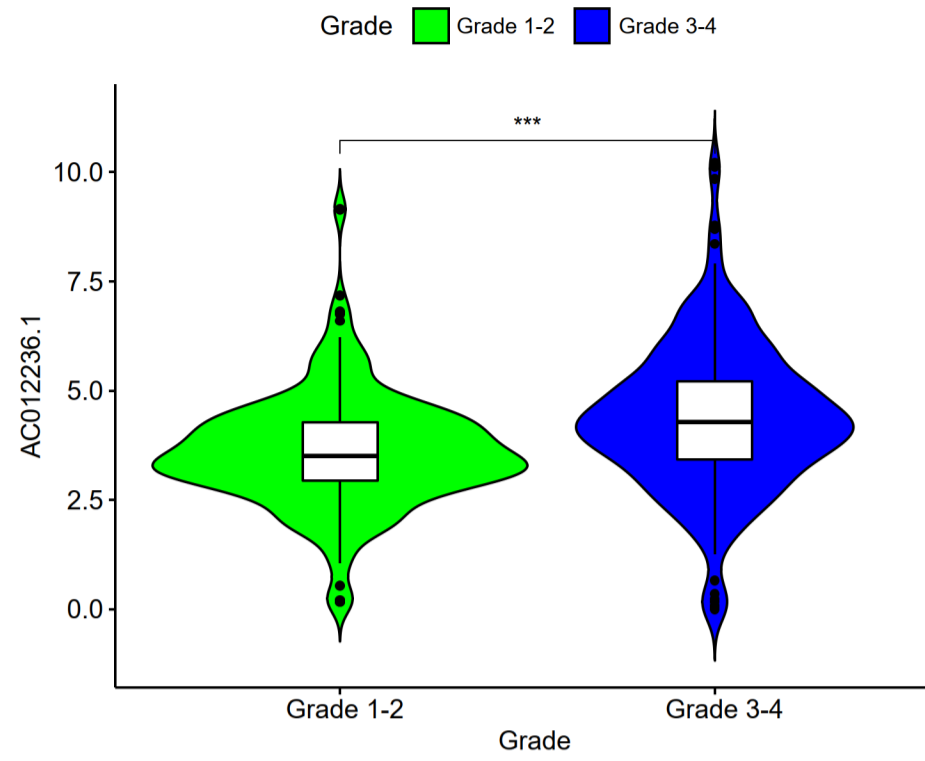**C**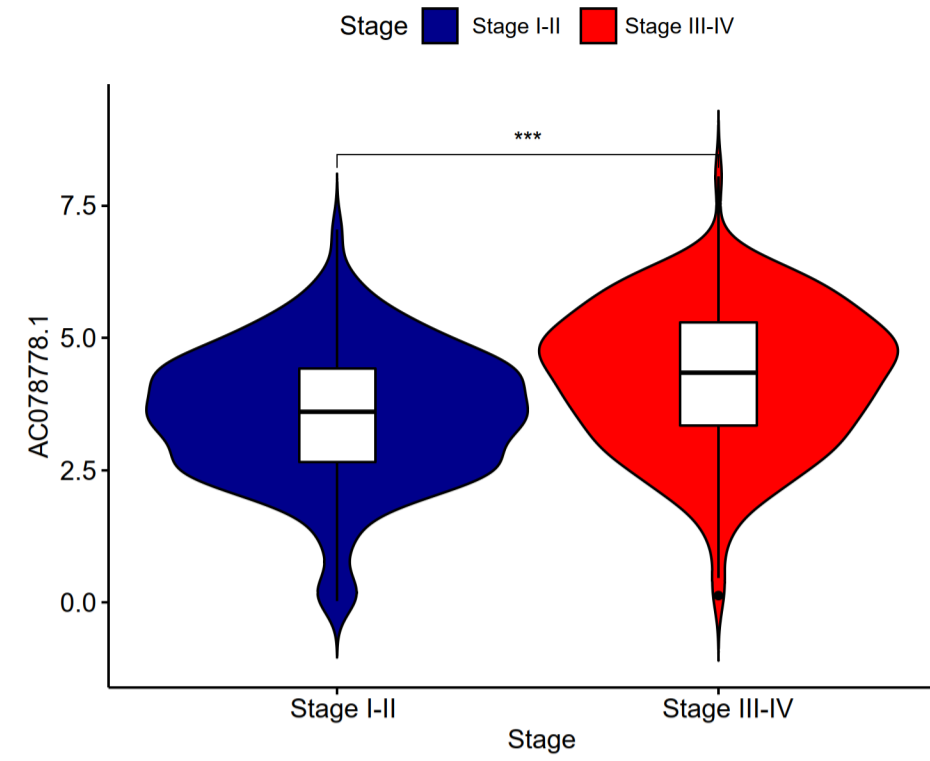**D**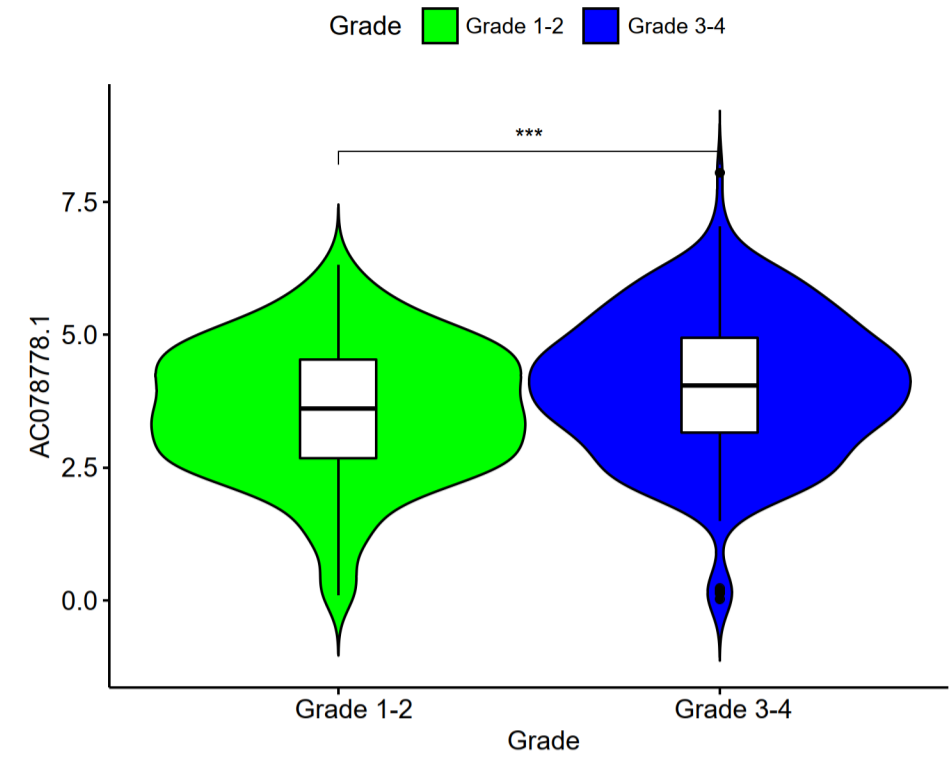**E**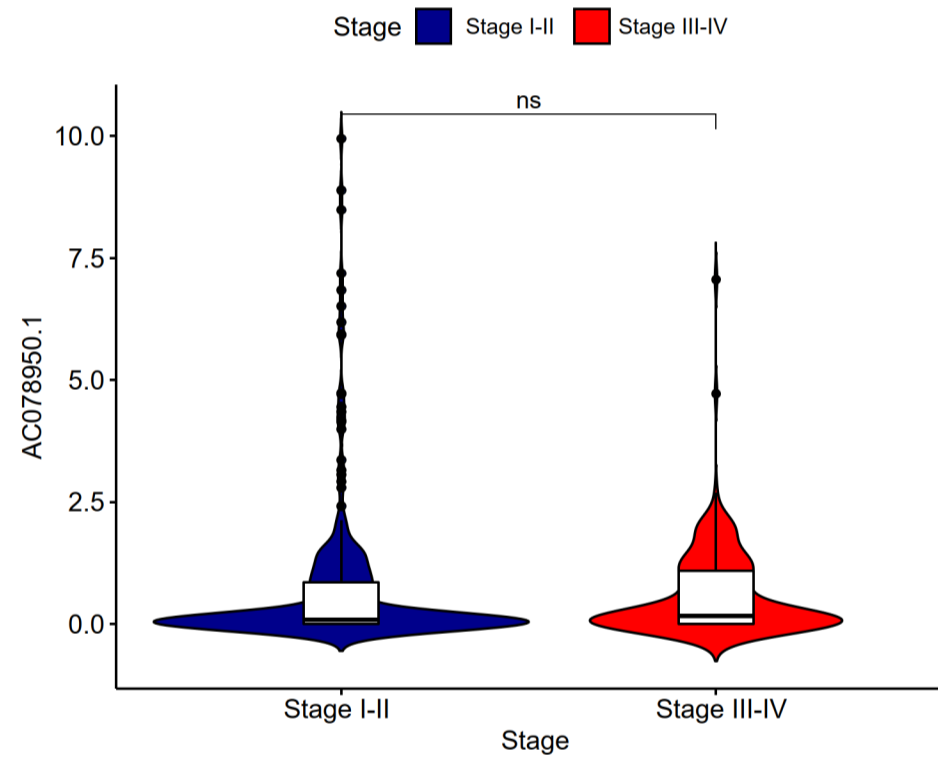**F**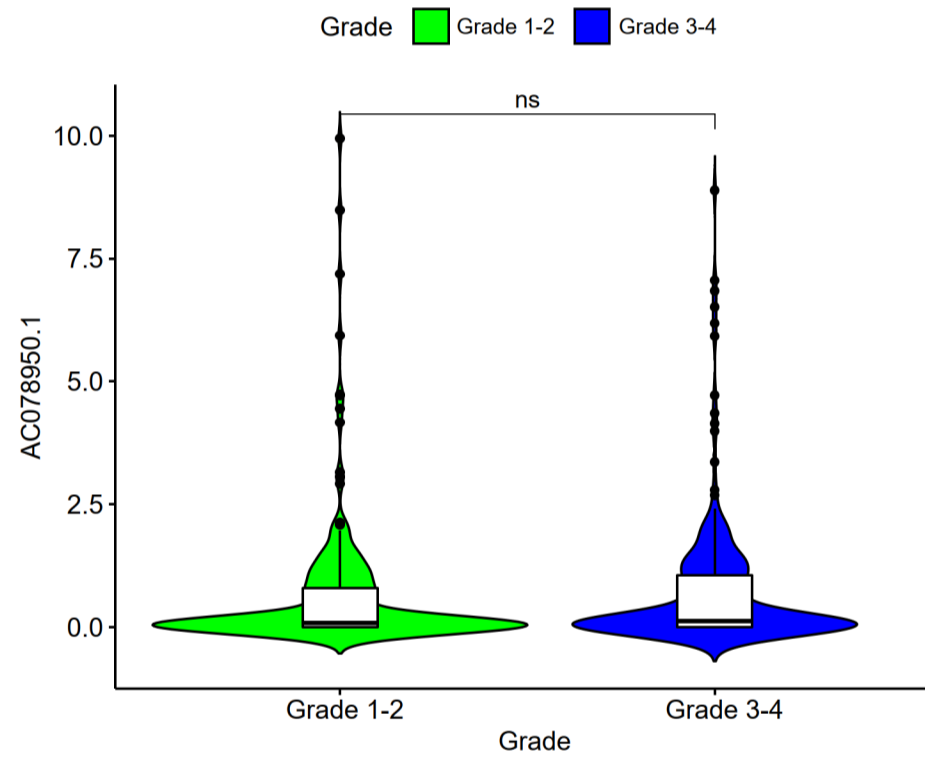**G**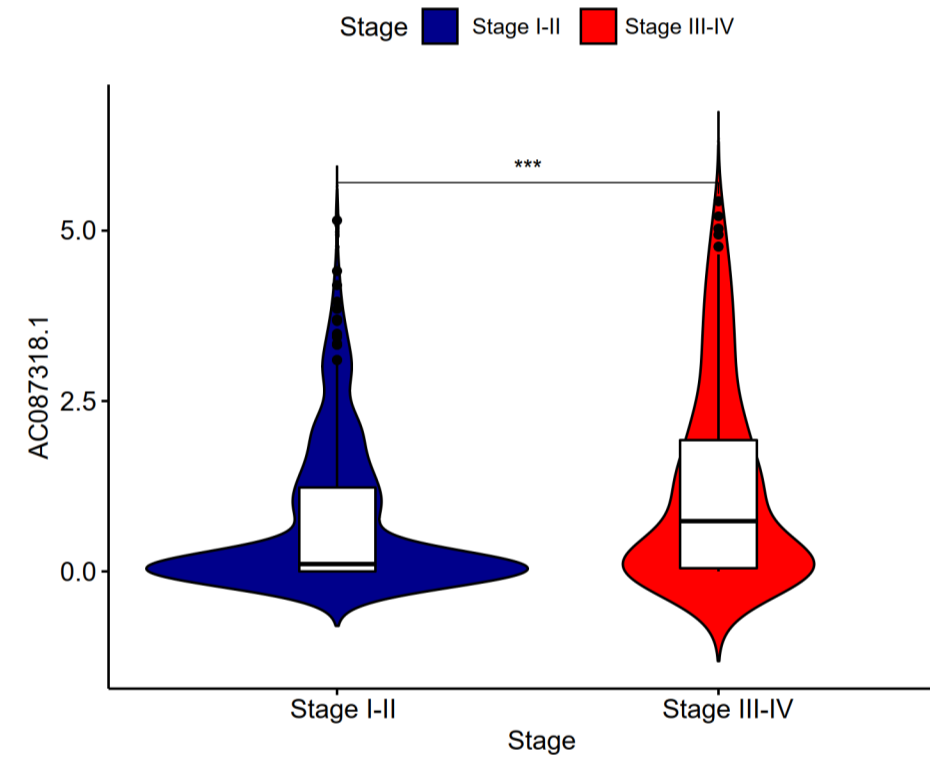**H**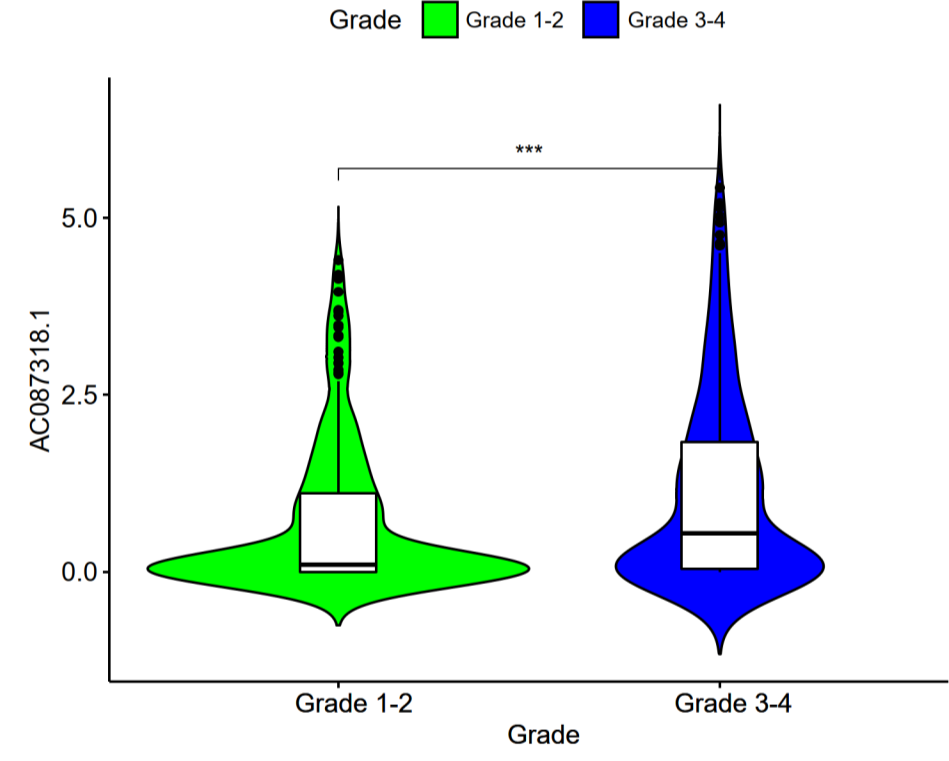**I**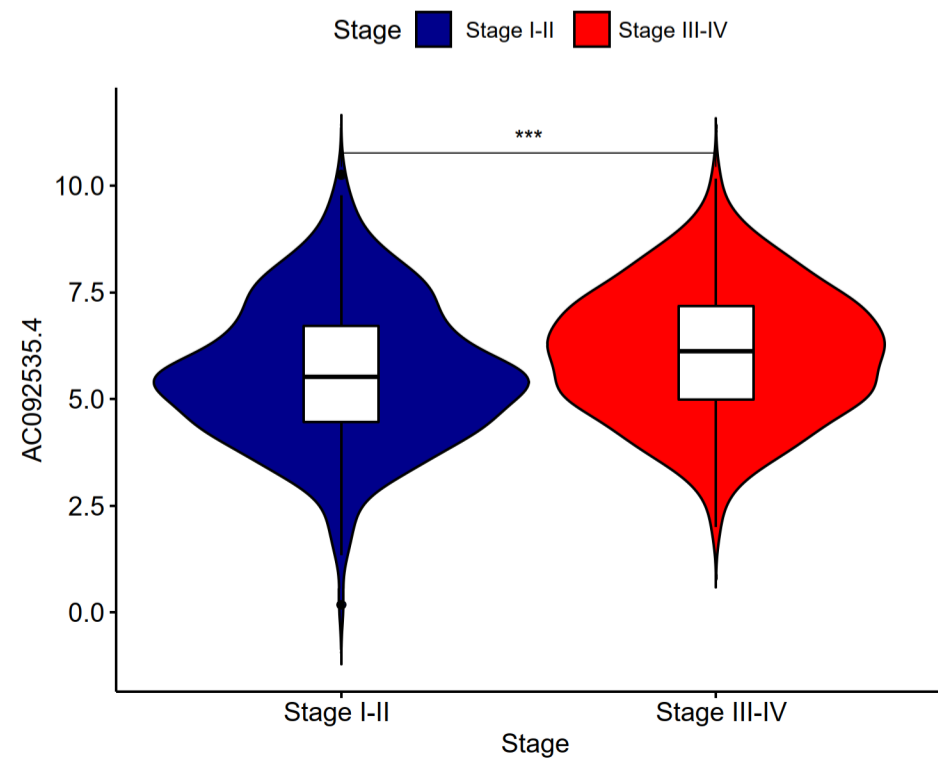**J**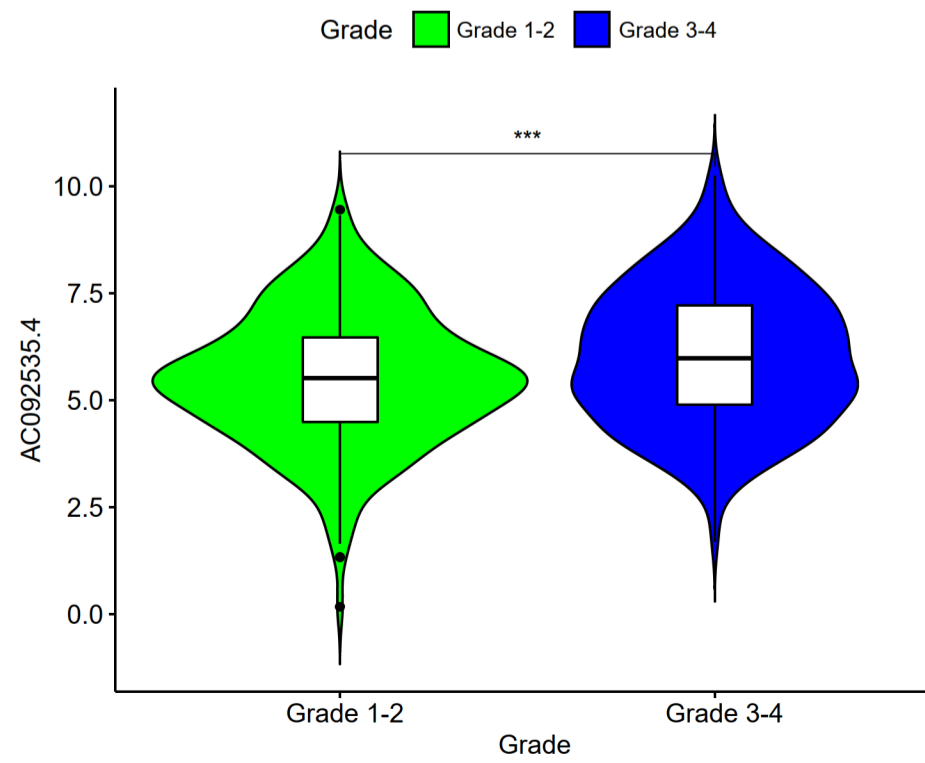**K**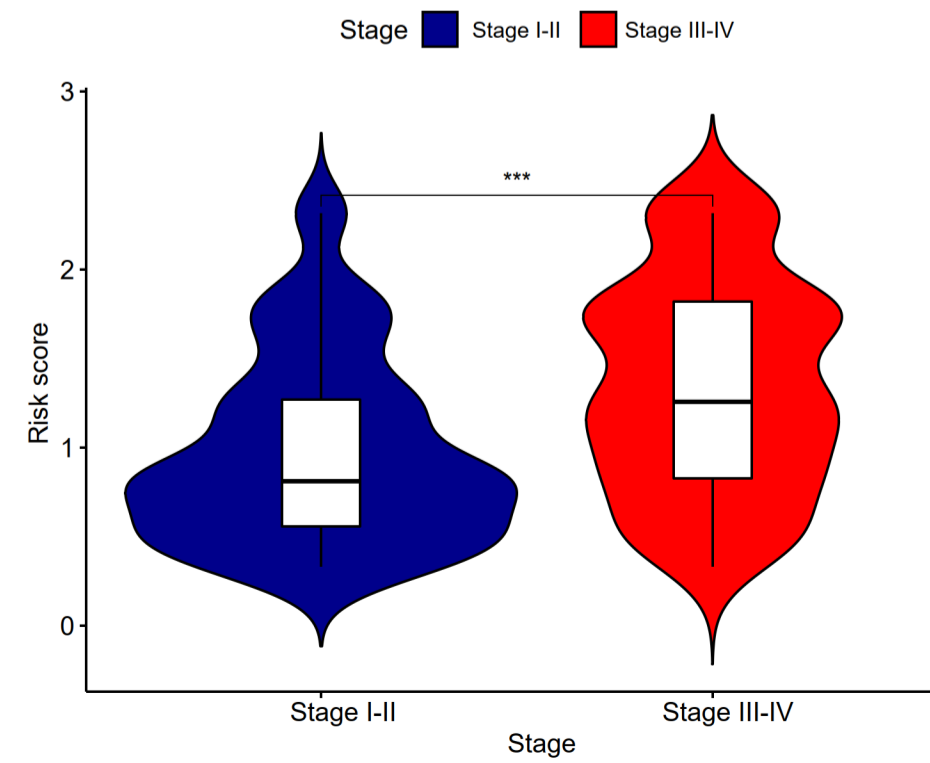**L**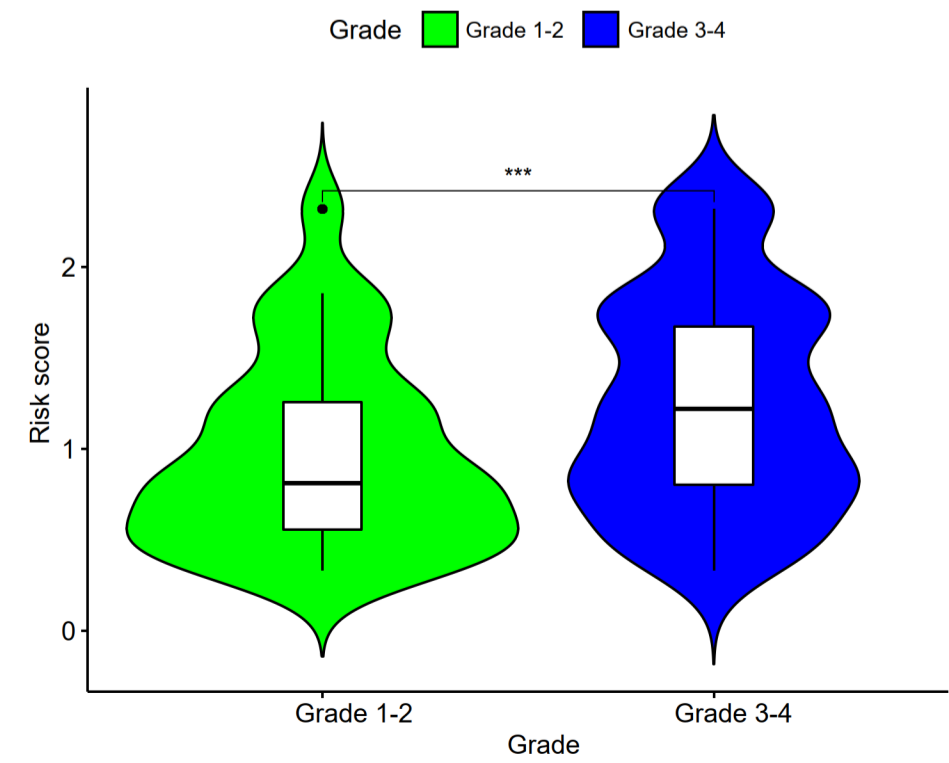

Supplement: f4 [file 9921466.f4.pdf]
