# Supplementary material for: A Novel Immune-Related lncRNA-Based Model for Survival Prediction in Clear Cell Renal Cell Carcinoma
Source: Hindawi journal article supplement (doi:10.1155/2021/9921466), 2021-06-28

A

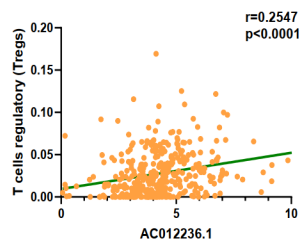

B

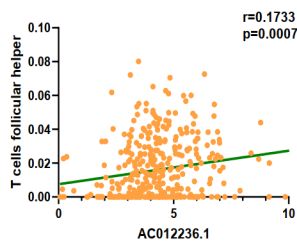

C

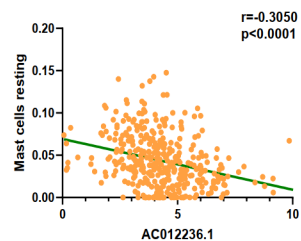

D

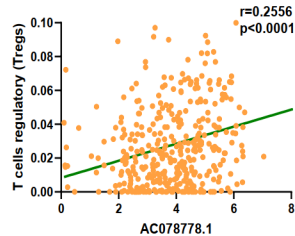

E

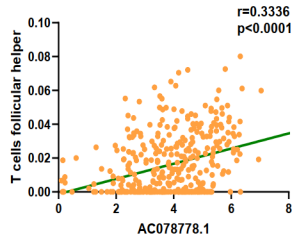

F

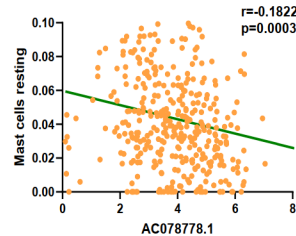

G

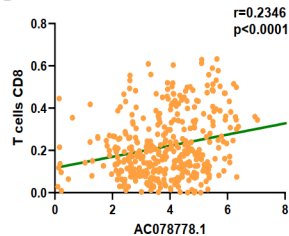

H

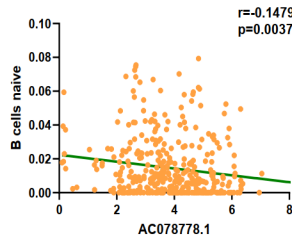

I

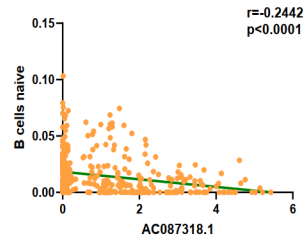

J

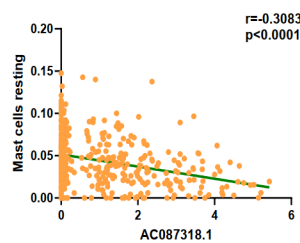

K

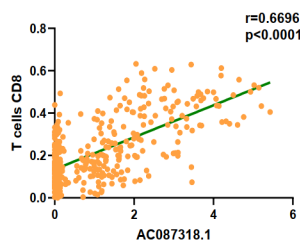

L

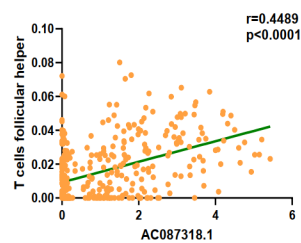

M

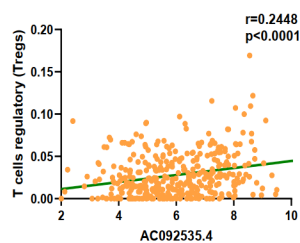

N

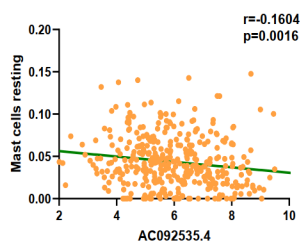

Supplement: f8 [file 9921466.f8.pdf]
